# Supplementary material for: A simple sensing platform based on a 1T@2H-MoS2/cMWCNTs composite modified electrode for ultrasensitive detection of illegal Sudan I dye in food samples
Source: Royal Society of Chemistry journal article supplement (doi:10.1039/d1ay01775f), 2022-01-01
Supplement: d1ay01775f1.pdf [file d1ay01775f1.pdf]

# **A simple sensing platform based on 1T@2H-MoS<sub>2</sub>/cMWCNTs composite modified electrode for ultrasensitive detection of the illegal Sudan I dye in food samples**

Qiaoling Wu,<sup>ab</sup> Chun Ji,<sup>c</sup> Lingli Zhang,<sup>ab</sup> Qingli Shi,<sup>ab</sup> Yuangen Wu,<sup>ab</sup> Han Tao<sup>\*ab</sup>

*<sup>a</sup>School of Liquor and Food Engineering, Guizhou University, Guiyang 550025, China.*

*<sup>b</sup>Key Laboratory of Fermentation Engineering and Biopharmacy of Guizhou Province, Guizhou University, Guiyang 550025, China.*

*<sup>c</sup>School of Pharmaceutical Sciences, Guizhou University, Guiyang 550025, China.*

---

\* Corresponding: Han Tao, School of Liquor and Food Engineering, Guizhou University, Guiyang 550025, China.

E-mail address: taohanedu@126.com

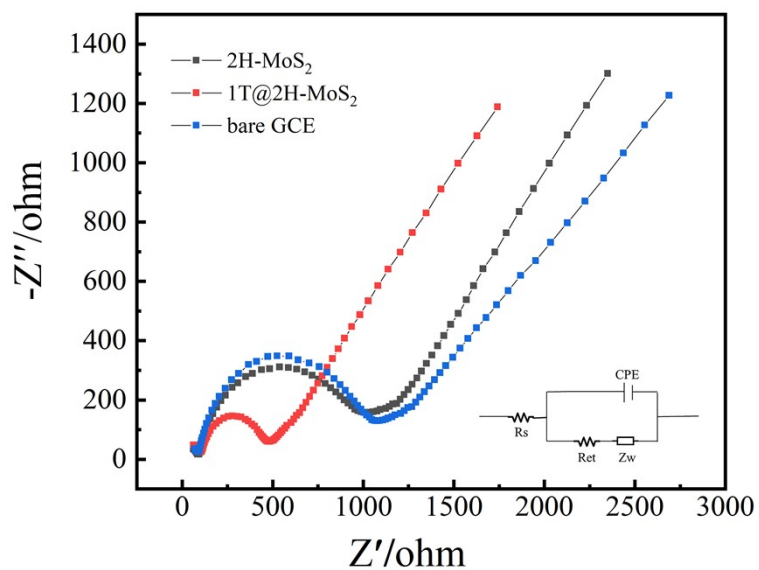

Fig. S1 Nyquist plots obtained at bare GCE (curve blue), 1T@2H-MoS<sub>2</sub>/cMWCNTs/GCE (curve red) and 2H-MoS<sub>2</sub>/GCE (curve black) in 0.1 M KCl solution containing 5 mM [Fe(CN)<sub>6</sub>]<sup>3-/4-</sup>. Frequency range: 0.01 Hz ~ 10 kHz, amplitude: 5 mV.

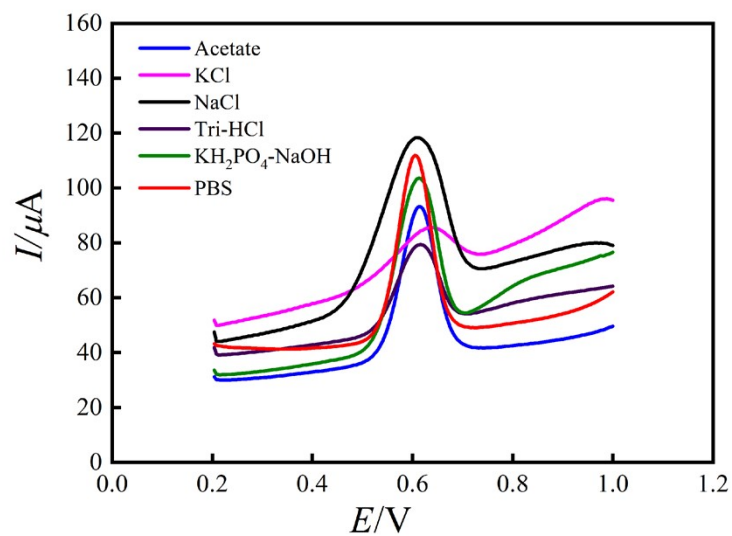

Fig. S2 SWV curves of 1T@2H-MoS<sub>2</sub>/cMWCNTs/GCE to 50 μM Sudan I in different supporting electrolyte solution (pH 7.0, 0.1 M). enrichment time: 120 s, potential window: 0.2 V~1.0 V.

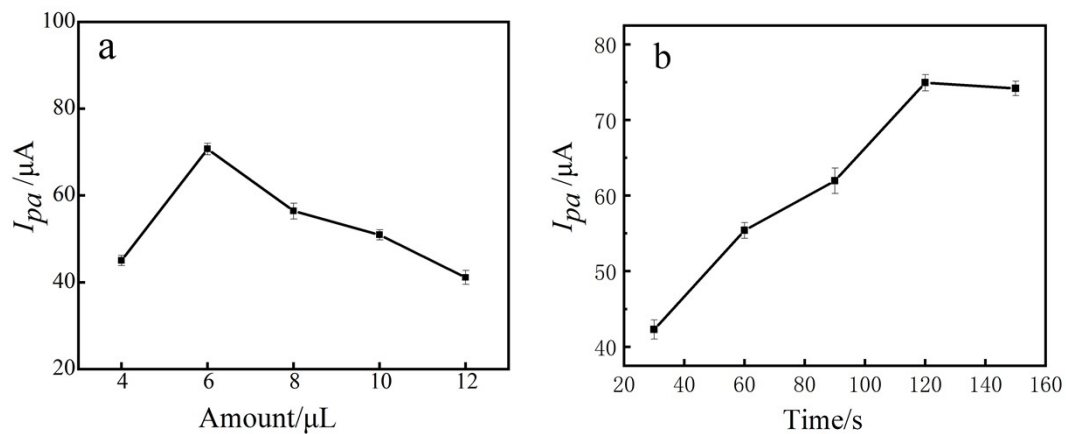

Fig. S3 (a) Effect of 1T@2H-MoS<sub>2</sub>/cMWCNTs loading volume on peak current of Sudan I (50  $\mu M$ ), (b) Effect of accumulation time on peak current of Sudan I (50  $\mu M$ ). Supporting electrolyte solution: 0.1 M PBS (pH 7.5), Other conditions are the same as in Fig. S2.

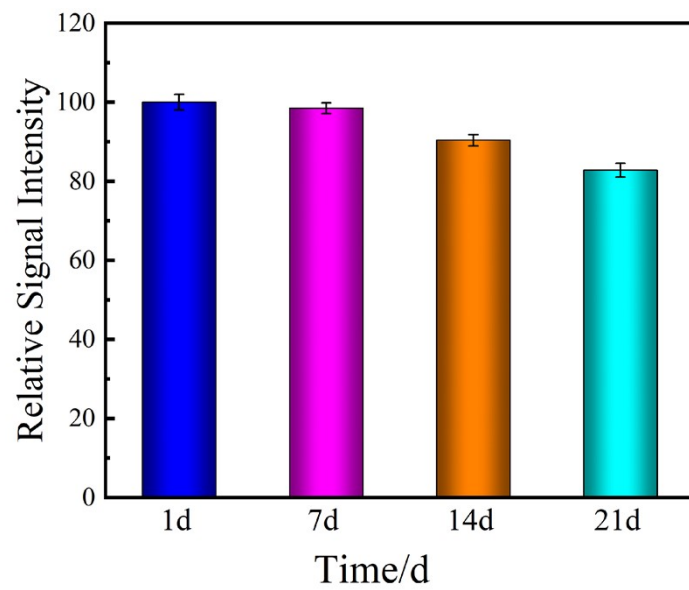

Fig. S4 Storage stability of 1T@2H-MoS<sub>2</sub>/cMWCNTs/GCE. The experimental conditions are the same as in Fig. 8.
